# Supplementary material for: AgX-based hybrid coordination polymers: mechanochemical synthesis, structure and luminescence property characterization
Source: Royal Society of Chemistry journal article supplement (doi:10.1039/d2fd00093h), 2022-07-06
Supplement: d2fd00093h1.pdf [file d2fd00093h1.pdf]

## Supporting Information

### AgX-based hybrid coordination polymers: mechanochemical synthesis, structure and luminescent properties characterization

Caterina Zuffa,<sup>a</sup> Chiara Cappuccino,<sup>b</sup> Marianna Marchini,<sup>a</sup> Laura Contini,<sup>a</sup> Francesco Farinella<sup>a</sup> and Lucia Maini\*<sup>a</sup>

#### 1. Knowledge Discovery on Database

ConQuest was used as tool to investigate the Cambridge Structural Database. First, we isolated from the database a subset containing all the structures of interest, namely those compounds that satisfy the following requirements: 1) structures containing silver coordinated simultaneously by X (with X = Cl, Br, I) and L (with L = N, P, As, O, S, Se); 2) structures in which there are no other metals and other semi-metals different from Ag; 3) structures in which the halide is the monoatomic anion; 4) structures without C-Ag bond. In the end, 791 structures met these requirements. We then divided the subset\_AgXL into polymeric (*AgXL\_Poly*) and non-polymeric structures (*AgXL\_NonPoly*). This was done exploiting the *not polymeric* filter provided by the software ConQuest.

Subsequently, in order to facilitate the determination of the coordination number of the halide, we divided each of these two subsets into structures featuring a bridged halide (with coordination number  $\geq 2$ : *AgXL\_NonPoly\_Xbridge*, *AgXL\_Poly\_Xbridge*) and structures that do not have a bridging halide (coordination number of the halide = 1 *AgXL\_NonPoly\_Xnonbridge*, *AgXL\_Poly\_Xnonbridge*). Here we document results of the partition:

**Table 1** Partition result of subset\_AgXL.

| First partition          | Structures number | Second partition             | Structures number | Third partition | Structures number |
|--------------------------|-------------------|------------------------------|-------------------|-----------------|-------------------|
| Polymeric structures     | 260               | Bridged halide structure     | 240               | Chlorides       | 87                |
|                          |                   |                              |                   | Bromides        | 72                |
|                          |                   |                              |                   | Iodides         | 87                |
|                          |                   | Non-bridged halide structure | 20                | Chlorides       | 11                |
|                          |                   |                              |                   | Bromides        | 7                 |
|                          |                   |                              |                   | Iodides         | 2                 |
| Non-polymeric structures | 531               | Bridged halide structure     | 318               | Chlorides       | 126               |
|                          |                   |                              |                   | Bromides        | 108               |
|                          |                   |                              |                   | Iodides         | 85                |
|                          |                   | Non-bridged halide structure | 213               | Chlorides       | 118               |
|                          |                   |                              |                   | Bromides        | 61                |
|                          |                   |                              |                   | Iodides         | 34                |

To investigate the presence of argentophilic interactions in AgXL we searched for those structures of the *AgXL\_subset* that features an Ag-Ag distance of less than 3.44 Å, whether this one distance both intramolecular and intermolecular. Below are reported the results:

**Table 2** Structures that satisfy the distance criterion.

| Structure typology       | Halide position              | Halide nature | Total number of structures | Number of structures with argentophilic interactions |
|--------------------------|------------------------------|---------------|----------------------------|------------------------------------------------------|
| Polymeric structures     | Bridged halide structure     | Chlorides     | 87                         | 24                                                   |
|                          |                              | Bromides      | 72                         | 49                                                   |
|                          |                              | Iodides       | 87                         | 75                                                   |
|                          | Non-bridged halide structure | Chlorides     | 11                         | 3                                                    |
|                          |                              | Bromides      | 7                          | 3                                                    |
|                          |                              | Iodides       | 2                          | 0                                                    |
| Non-polymeric structures | Bridged halide structure     | Chlorides     | 126                        | 45                                                   |
|                          |                              | Bromides      | 108                        | 59                                                   |
|                          |                              | Iodides       | 85                         | 64                                                   |
|                          | Non-bridged halide structure | Chlorides     | 118                        | 15                                                   |
|                          |                              | Bromides      | 61                         | 2                                                    |
|                          |                              | Iodides       | 34                         | 1                                                    |

## 2. Crystallographic information

*AgI-based coordination polymers*

**Table 3** Crystal data and structure refinement for [(AgI)(n-pica)]<sub>n</sub> coordination polymers.

|                                                   | [(AgI)(2-pica)] <sub>n</sub>                    | [(AgI)(3-pica)] <sub>n</sub>                       | [(AgI)(4-pica)] <sub>n</sub>                       |
|---------------------------------------------------|-------------------------------------------------|----------------------------------------------------|----------------------------------------------------|
| Empirical formula                                 | C <sub>6</sub> H <sub>8</sub> AgIN <sub>2</sub> | C <sub>6</sub> H <sub>8</sub> AgIN <sub>2</sub>    | C <sub>6</sub> H <sub>8</sub> AgIN <sub>2</sub>    |
| Formula weight (g mol <sup>-1</sup> )             | 342.91                                          | 342.91                                             | 342.91                                             |
| T (K)                                             | 293                                             | 293                                                | 293                                                |
| Wavelength (Å)                                    | 1.535                                           | 0.71073                                            | 0.71073                                            |
| Crystal system                                    | triclinic                                       | monoclinic                                         | monoclinic                                         |
| Space group                                       | P-1                                             | P2 <sub>1</sub> /c                                 | P2 <sub>1</sub> /c                                 |
| <i>a</i> (Å)                                      | 4.579                                           | 16.9162(7)                                         | 4.4664(3)                                          |
| <i>b</i> (Å)                                      | 10.323                                          | 4.5682(2)                                          | 19.2155(11)                                        |
| <i>c</i> (Å)                                      | 10.263                                          | 22.7197(8)                                         | 10.5788(6)                                         |
| <i>a</i> (Å)                                      | 112.54                                          | 90                                                 | 90                                                 |
| <i>b</i> (Å)                                      | 83.86                                           | 90.447(4)                                          | 96.346(5)                                          |
| <i>g</i> (Å)                                      | 85.59                                           | 90                                                 | 90                                                 |
| <i>V</i> (Å <sup>3</sup> )                        | 442                                             | 1755(2)                                            | 902.35(10)                                         |
| <i>Z</i> , <i>Z'</i>                              | 2, 1                                            | 4, 1                                               | 4, 1                                               |
| $\rho_{\text{calc}}$ (mg m <sup>-3</sup> )        | 2.577                                           | 2.595                                              | 2.524                                              |
| $\mu$ (mm <sup>-1</sup> )                         |                                                 | 5.743                                              | 5.587                                              |
| <i>F</i> (000)                                    |                                                 | 1264                                               | 632                                                |
| crystal size (mm)                                 | powder                                          | 0.4028×0.0774×0.0618                               | 0.05×0.04×0.03                                     |
| $\vartheta$ range for data collection (°)         | 5° to 70°                                       | 3.587° to 29.528°                                  | 3.725° to 29.290°                                  |
| reflections collected                             |                                                 | 9734                                               | 3158                                               |
| Independent reflections                           |                                                 | 4082                                               | 1891                                               |
| <i>R</i> <sub>int</sub>                           | 0.0063                                          | 0.0939                                             | 0.0236                                             |
| Completeness to theta = 25.000°                   |                                                 | 99.8%                                              | 96.7%                                              |
| Refinement method                                 | Rietveld                                        | Full-matrix least-squares on <i>F</i> <sup>2</sup> | Full-matrix least-squares on <i>F</i> <sup>2</sup> |
| <i>T</i> <sub>max</sub> / <i>T</i> <sub>min</sub> |                                                 | 1.00000/0.25756                                    | 1.00000/0.80811                                    |
| data/restraints/parameters                        |                                                 | 4082 / 0 / 181                                     | 1891 / 0 / 99                                      |
| Goodness-of-fit                                   | 2.036                                           | 1.065                                              | 1.051                                              |
| <i>R</i> 1 [ <i>I</i> > 2σ( <i>I</i> )]           | 0.0280                                          | 0.0596                                             | 0.0486                                             |
| w <i>R</i> 2 (all data)                           | 0.0370                                          | 0.1351                                             | 0.0837                                             |

*AgBr-based coordination polymers*

**Table 4** Crystal data and structure refinement for [(AgBr)(n-pica)]<sub>n</sub> coordination polymers.

|                                            | [(AgBr)(2-pica)] <sub>n</sub>                    | [(AgBr)(3-pica)] <sub>n</sub>                    | [(AgBr)(4-pica)] <sub>n</sub>                    |
|--------------------------------------------|--------------------------------------------------|--------------------------------------------------|--------------------------------------------------|
| Empirical formula                          | C <sub>6</sub> H <sub>8</sub> AgBrN <sub>2</sub> | C <sub>6</sub> H <sub>8</sub> AgBrN <sub>2</sub> | C <sub>6</sub> H <sub>8</sub> AgBrN <sub>2</sub> |
| Formula weight (g mol <sup>-1</sup> )      | 295.915                                          | 295.915                                          | 295.915                                          |
| T (K)                                      | 293                                              | 293                                              | 293                                              |
| Wavelength (Å)                             | 0.71073                                          | 0.71073                                          | 1.535                                            |
| Crystal system                             | triclinic                                        | monoclinic                                       | monoclinic                                       |
| Space group                                | P-1                                              | P2 <sub>1</sub> /c                               | P2 <sub>1</sub> /c                               |
| <i>a</i> (Å)                               | 4.3871(5)                                        | 9.4518(6)                                        | 6.316                                            |
| <i>b</i> (Å)                               | 10.1081(12)                                      | 6.1880(3)                                        | 7.365                                            |
| <i>c</i> (Å)                               | 10.2510(18)                                      | 14.3981(9)                                       | 17.769                                           |
| <i>a</i> (Å)                               | 113.498(14)                                      | 90                                               | 90                                               |
| <i>b</i> (Å)                               | 97.081(12)                                       | 105.712(6)                                       | 81.08                                            |
| <i>g</i> (Å)                               | 93.535(9)                                        | 90                                               | 90                                               |
| <i>V</i> (Å <sup>3</sup> )                 | 410.63(11)                                       | 810.64(8)                                        | 816                                              |
| <i>Z</i> , <i>Z'</i>                       | 2, 1                                             | 4, 1                                             | 4, 1                                             |
| $\rho_{\text{calc}}$ (mg m <sup>-3</sup> ) | 2.393                                            | 2.425                                            | 2.407                                            |
| $\mu$ (mm <sup>-1</sup> )                  | 7.244                                            | 7.339                                            |                                                  |
| <i>F</i> (000)                             | 280                                              | 560                                              |                                                  |
| crystal size (mm)                          | 0.379×0.201×0.039                                | 0.141×0.134×0.041                                | powder                                           |
| $\vartheta$ range for data collection (°)  | 3.704° to 29.105°                                | 3.606° to 29.112°                                | 5° to 60°                                        |
| reflections collected                      | 3052                                             | 3457                                             |                                                  |

|                                    |                                       |                                       |          |
|------------------------------------|---------------------------------------|---------------------------------------|----------|
| Independent reflections            | 1853                                  | 1874                                  |          |
| $R_{\text{int}}$                   | 0.0253                                | 0.0307                                | 0.0143   |
| Completeness to theta =<br>25.000° | 99.7%                                 | 99.8%                                 |          |
| Refinement method                  | Full-matrix least-squares on<br>$F^2$ | Full-matrix least-squares on<br>$F^2$ | Rietveld |
| $T_{\text{max}}/T_{\text{min}}$    | 1.00000/0.67900                       | 1.00000/0.45264                       |          |
| data/restraints/parameters         | 1853 / 0 / 92                         | 1874 / 0 / 91                         |          |
| Goodness-of-fit                    | 0.983                                 | 1.041                                 | 1.337    |
| R1 [ $I > 2\sigma(I)$ ]            | 0.0448                                | 0.0419                                | 0.0290   |
| wR2 (all data)                     | 0.0854                                | 0.0852                                | 0.0369   |

### 3. PXRD pattern

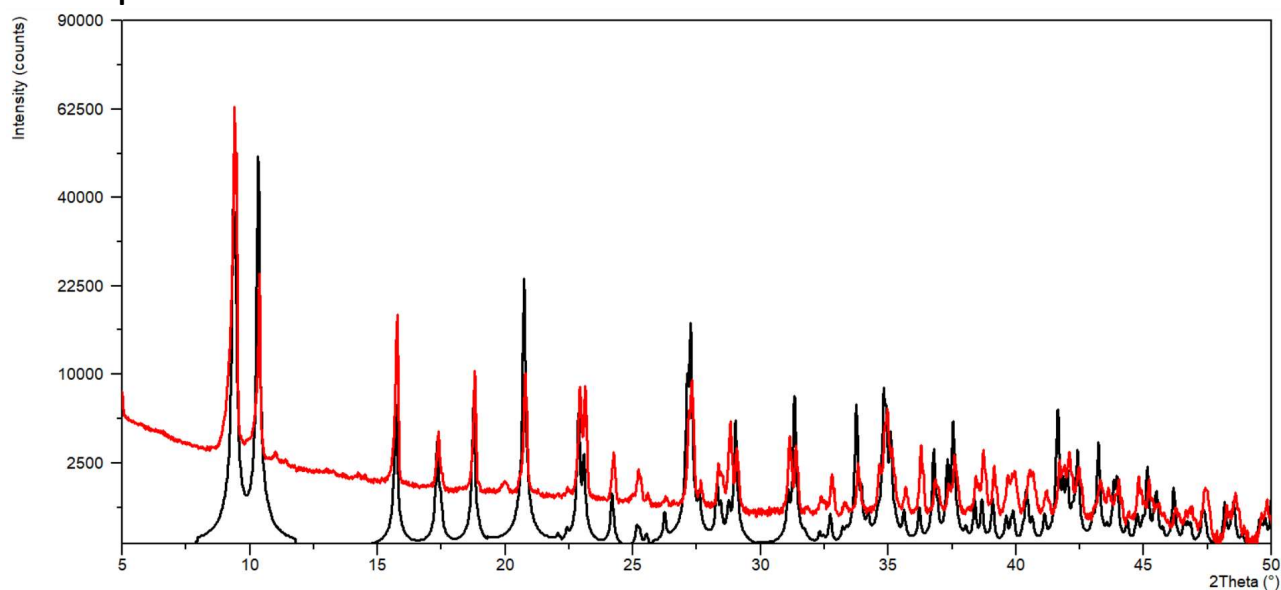

**Figure 1** Comparison between calculated (black line) and experimental (red line) X-ray powder diffraction patterns of  $[(\text{AgI})(2\text{-pica})]_n$ . The diffractograms are shown in square root intensity mode. Peaks at  $2\theta = 22.43^\circ$  and  $25.20^\circ$  belong to AgI.

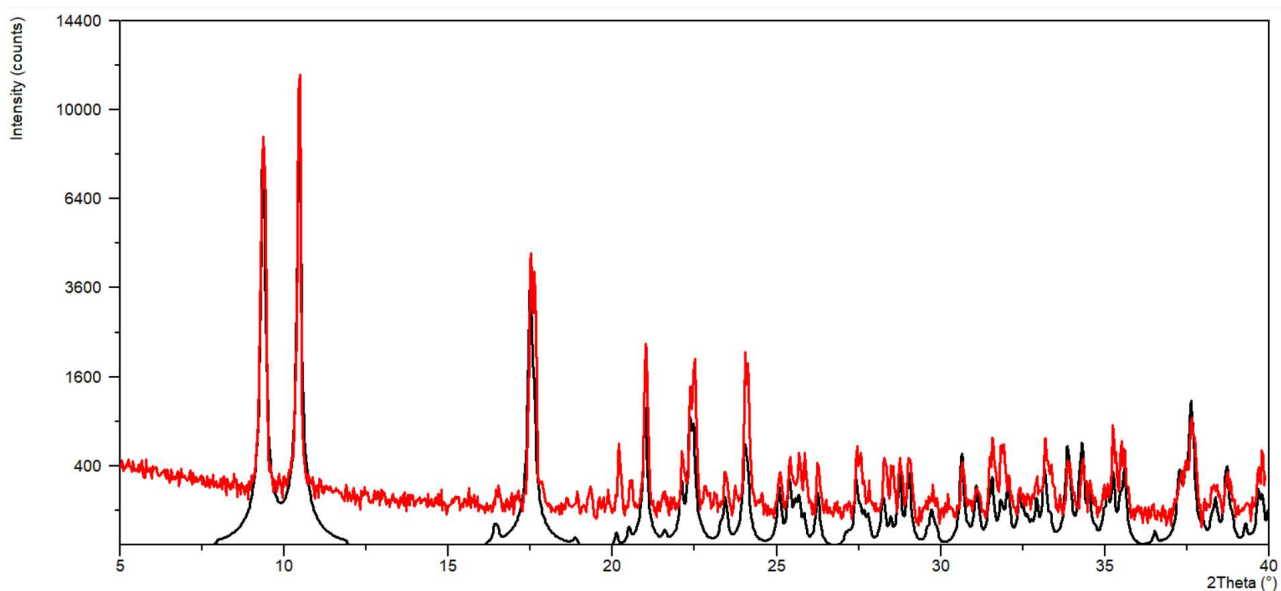

**Figure 2** Comparison between calculated (black line) and experimental (red line) X-ray powder diffraction patterns of  $[(\text{AgI})(3\text{-pica})]_n$ . The diffractograms are shown in square root intensity mode.

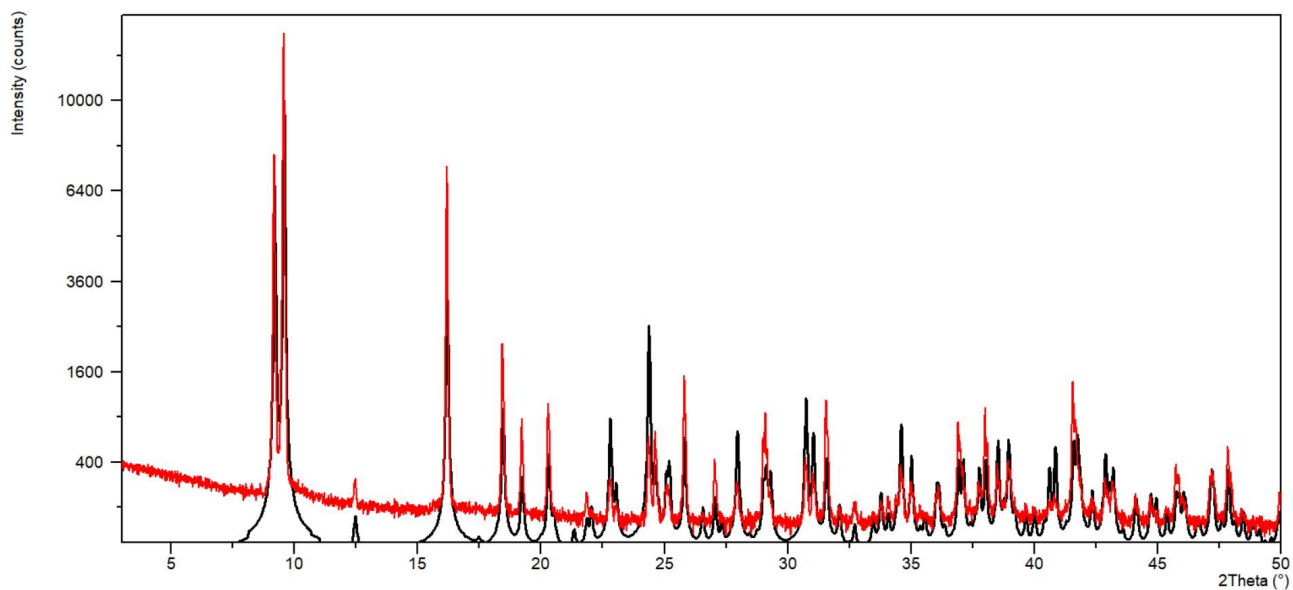

**Figure 3** Comparison between calculated (black line) and experimental (red line) X-ray powder diffraction patterns of  $[(\text{AgI})(4\text{-pica})]_n$ . The diffractograms are shown in square root intensity mode.

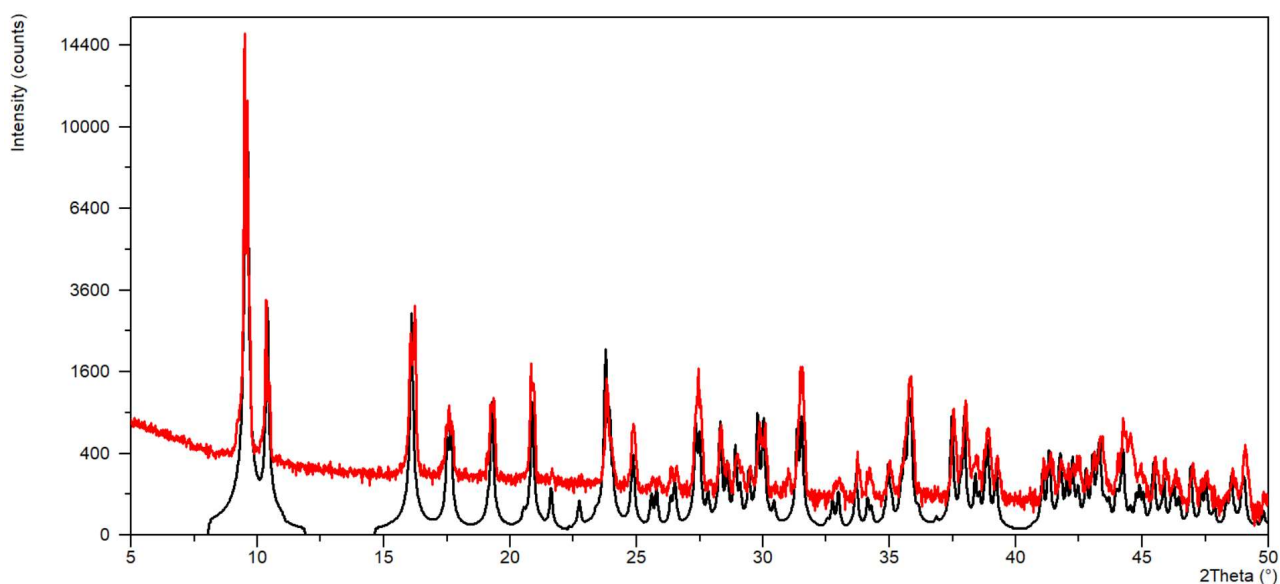

**Figure 4** Comparison between calculated (black line) and experimental (red line) X-ray powder diffraction patterns of  $[(\text{AgBr})(2\text{-pica})]_n$ . The diffractograms are shown in square root intensity mode.

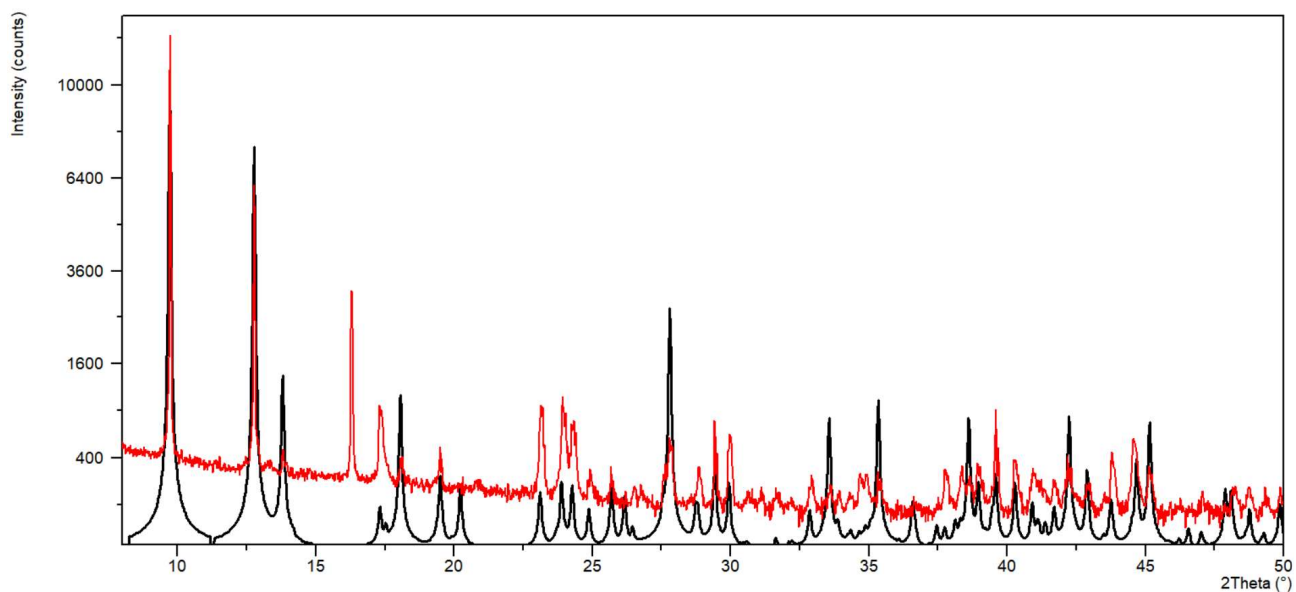

**Figure 5** Comparison between calculated (black line) and experimental (red line) X-ray powder diffraction patterns of  $[(\text{AgBr})(3\text{-pica})]_n$ . The diffractograms are shown in square root intensity mode. The peak at  $2\theta = 16.30^\circ$  belongs to the sample holder.

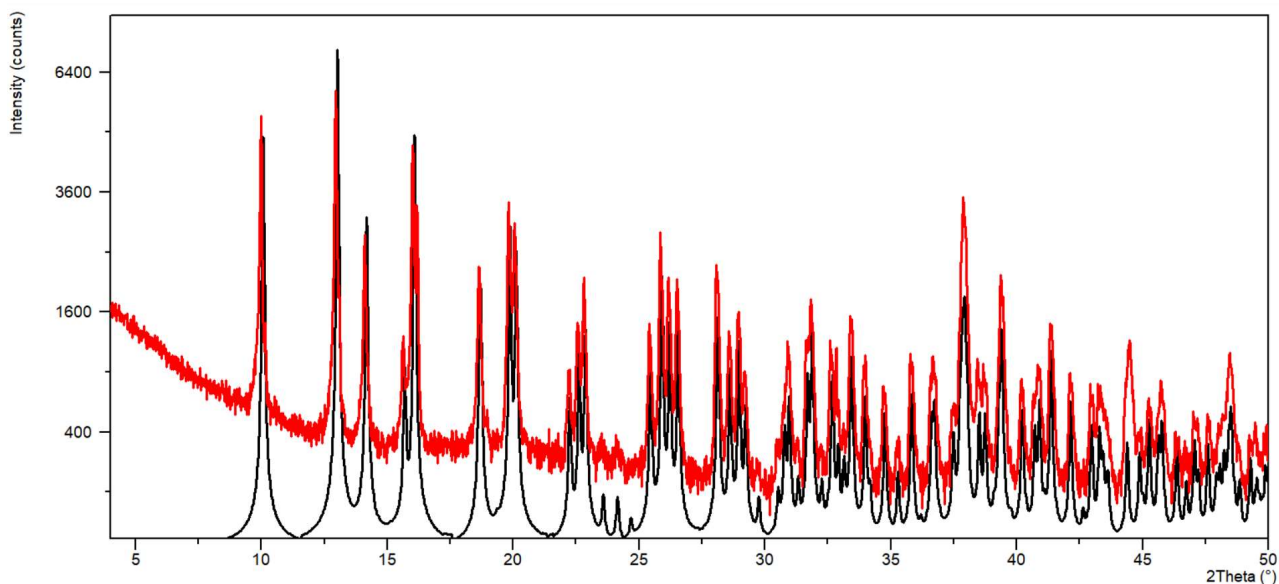

**Figure 6** Comparison between calculated (black line) and experimental (red line) X-ray powder diffraction patterns of  $[(\text{AgBr})(4\text{-pica})]_n$ .

### 3. Rietveld refinement

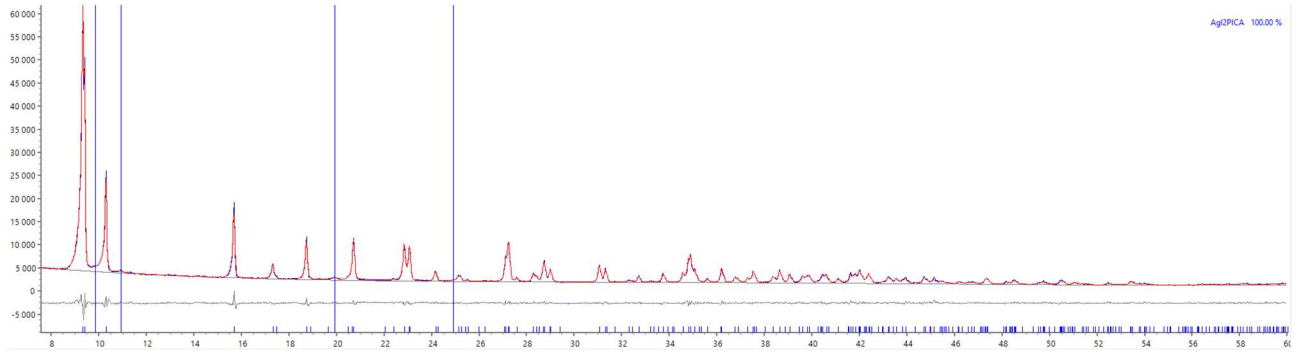

**Figure 7** Rietveld refinement (red line) on  $[(AgI)(2-pica)]_n$  diffraction pattern (blue line). The blue lines indicate weak and broad peaks due to impurities. In grey, the difference plot.

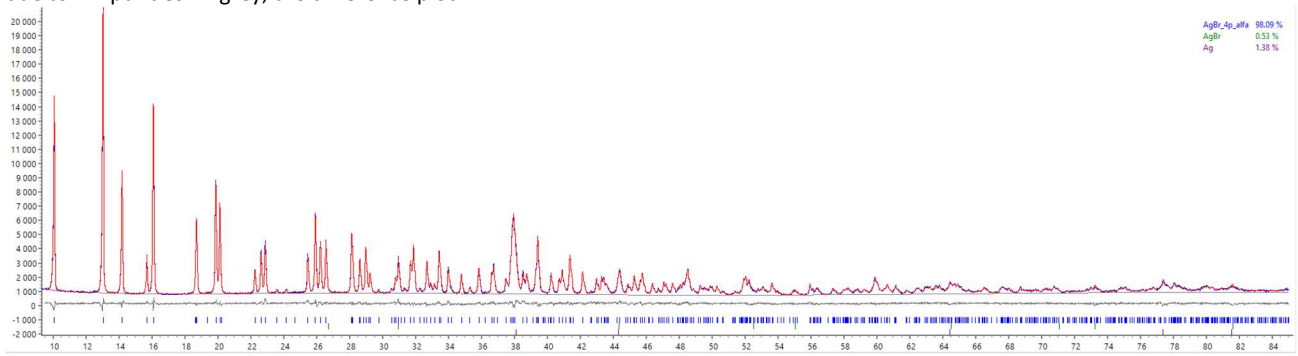

**Figure 8** Rietveld refinement (red line) on  $[(AgBr)(4-pica)]_n$  diffraction pattern (blue line). Peaks of unreacted AgBr and Ag (due to photodecomposition) are present. In grey, the difference plot.

#### 4. Luminescence properties

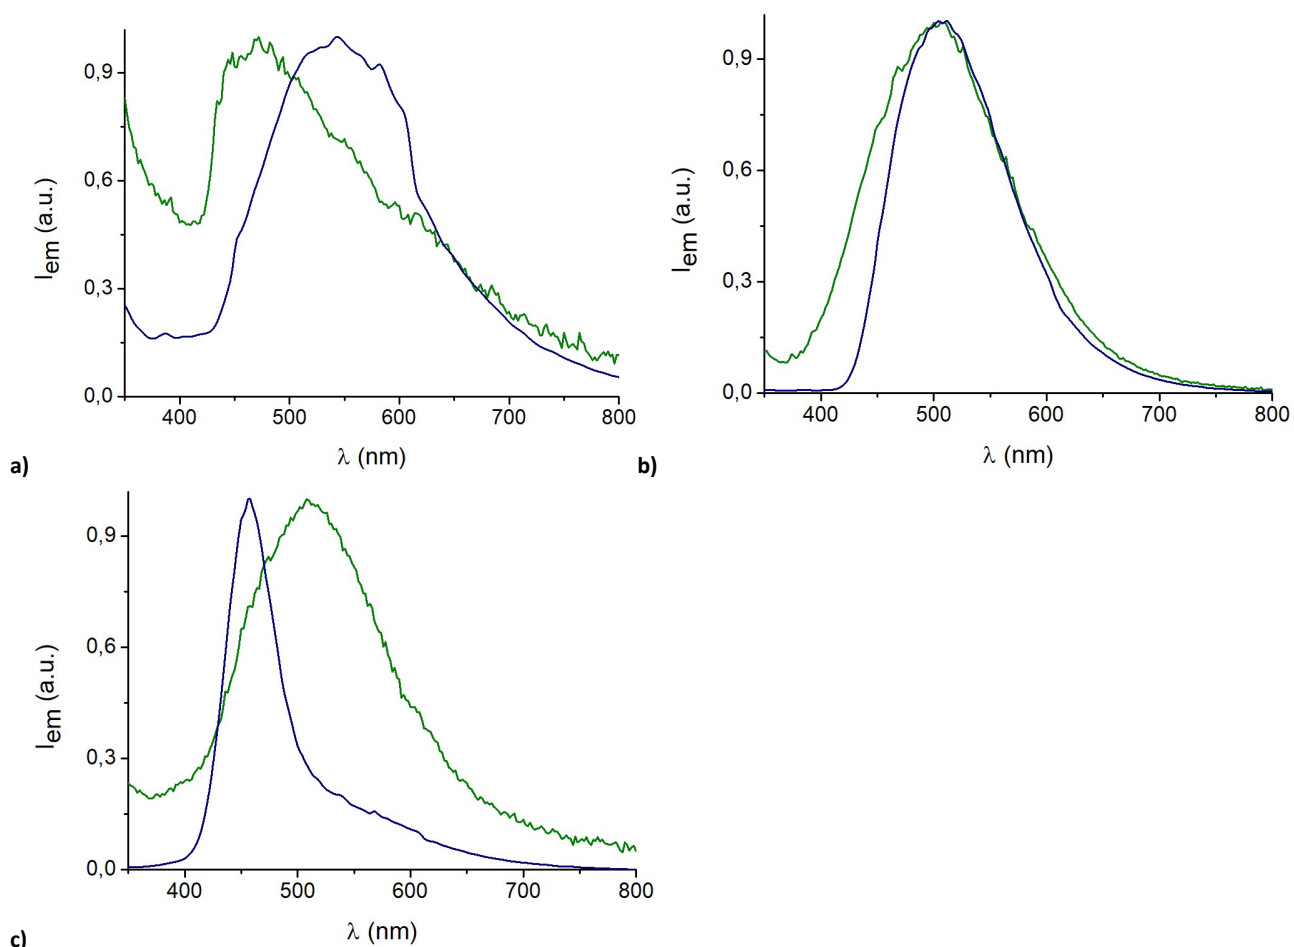

**Figure 9** Solid state emission spectra at room temperature (green line) and at 77K (blue line) of **a)** [(AgBr)(2-pica)]<sub>n</sub>; **b)** [(AgBr)(3-pica)]<sub>n</sub>; **c)** [(AgBr)(4-pica)]<sub>n</sub> obtained by ball milling.

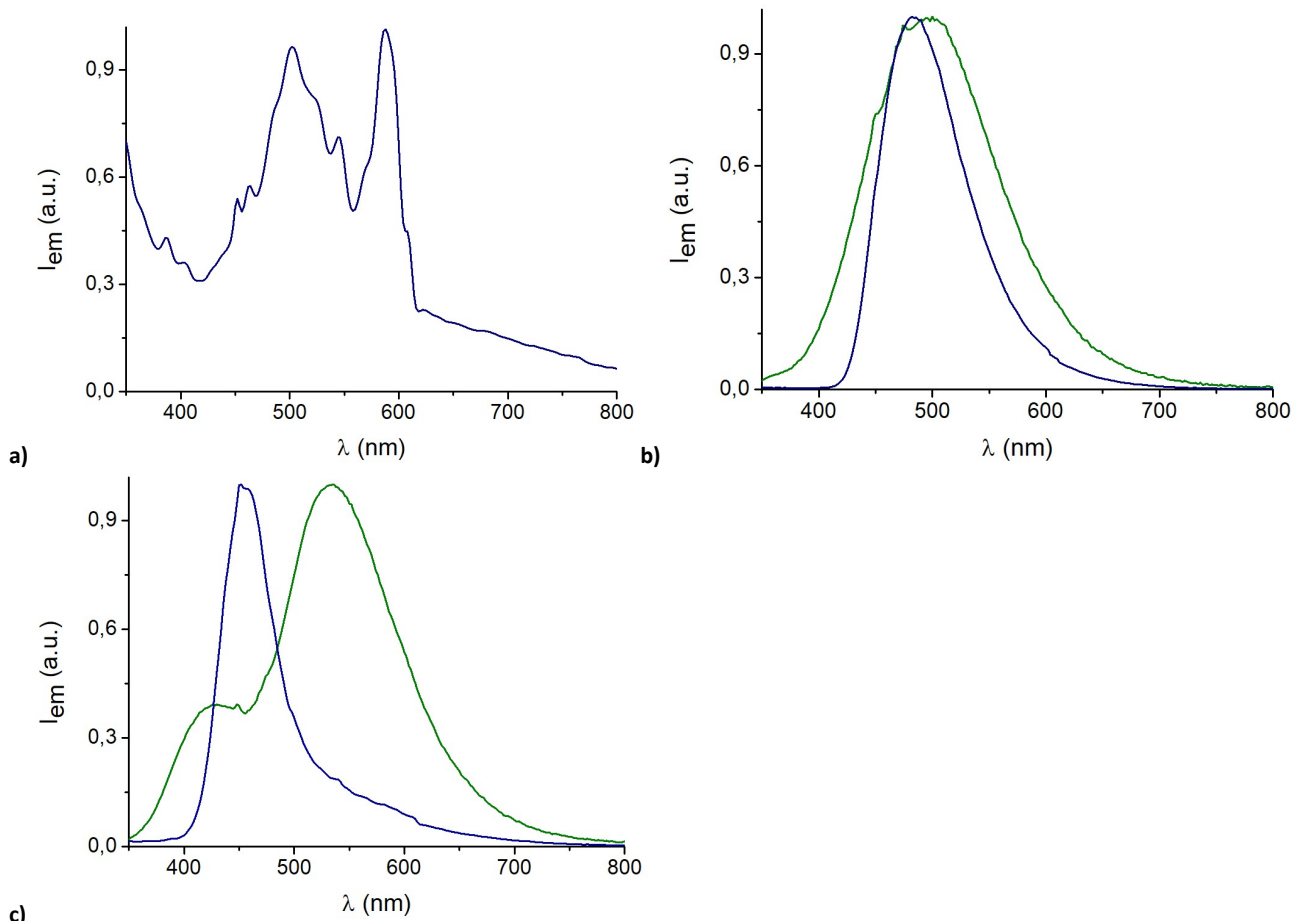

**Figure 10** Solid state emission spectra at room temperature (green line) and at 77K (blue line) of **a)**  $[(AgBr)(2-pica)]_n$ ; **b)**  $[(AgBr)(3-pica)]_n$ ; **c)**  $[(AgBr)(4-pica)]_n$  obtained by slurry.

#### 4. TGA analysis

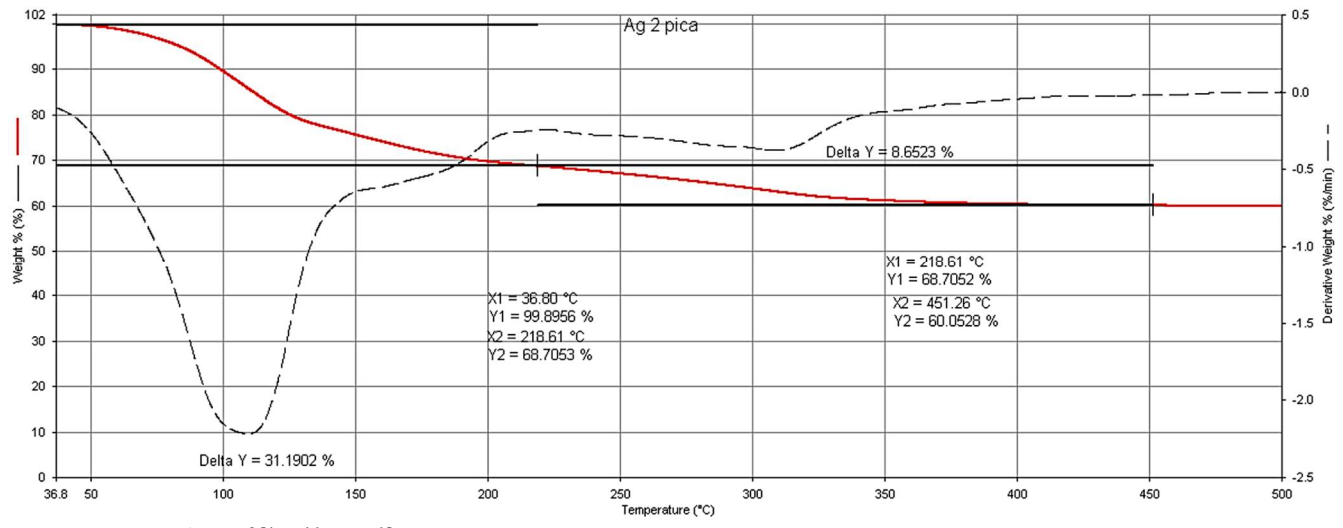

**Figure 11** TGA analysis of  $[(AgI)(2-pica)]_n$ .



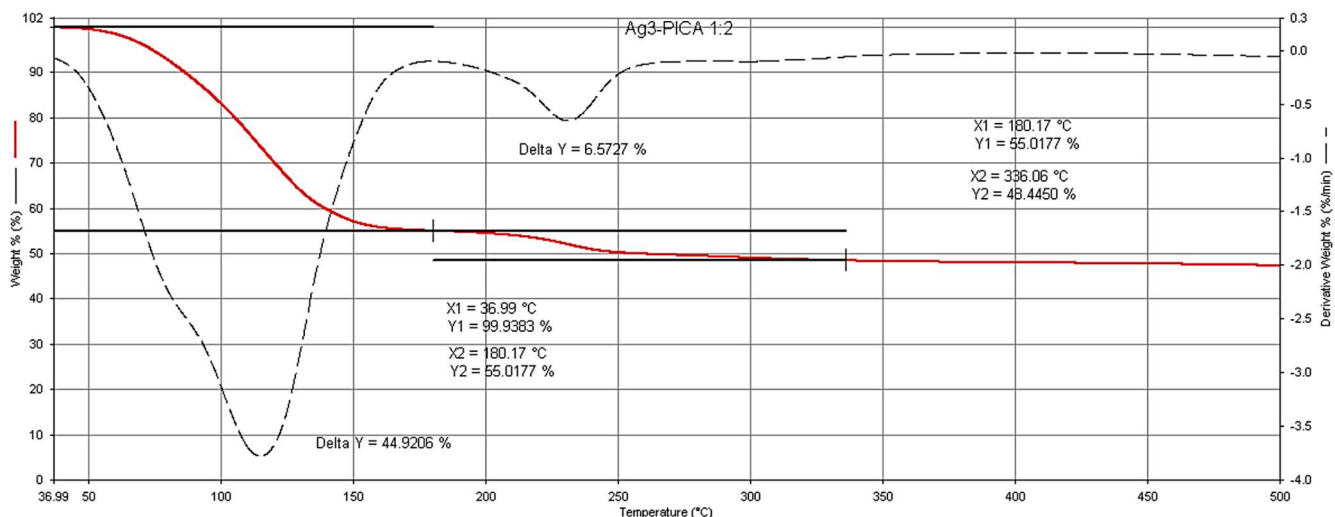

Figure 12 TGA analysis of  $[(AgI)(3-pica)]_n$ .

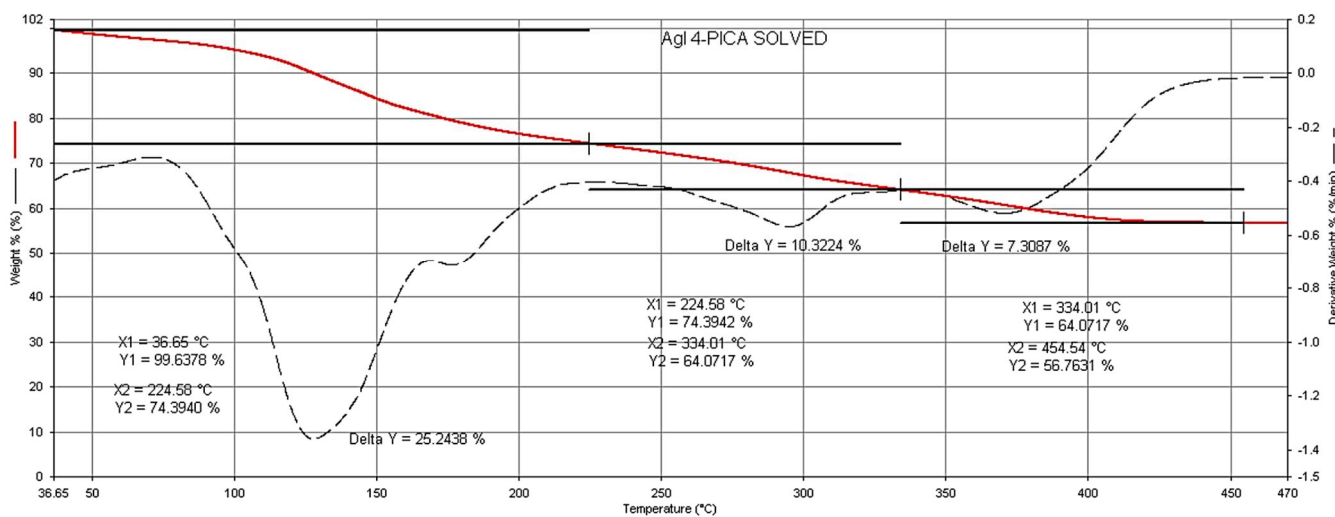

Figure 13 TGA analysis of  $[(AgI)(4-pica)]_n$ .

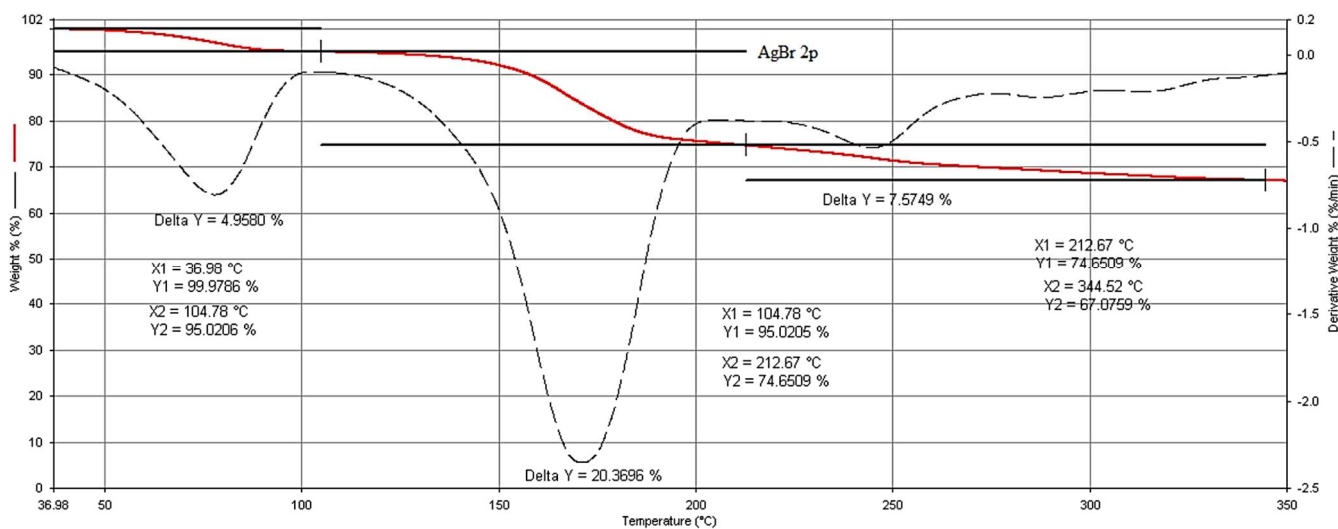

Figure 14 TGA analysis of  $[(AgBr)(2-pica)]_n$ .

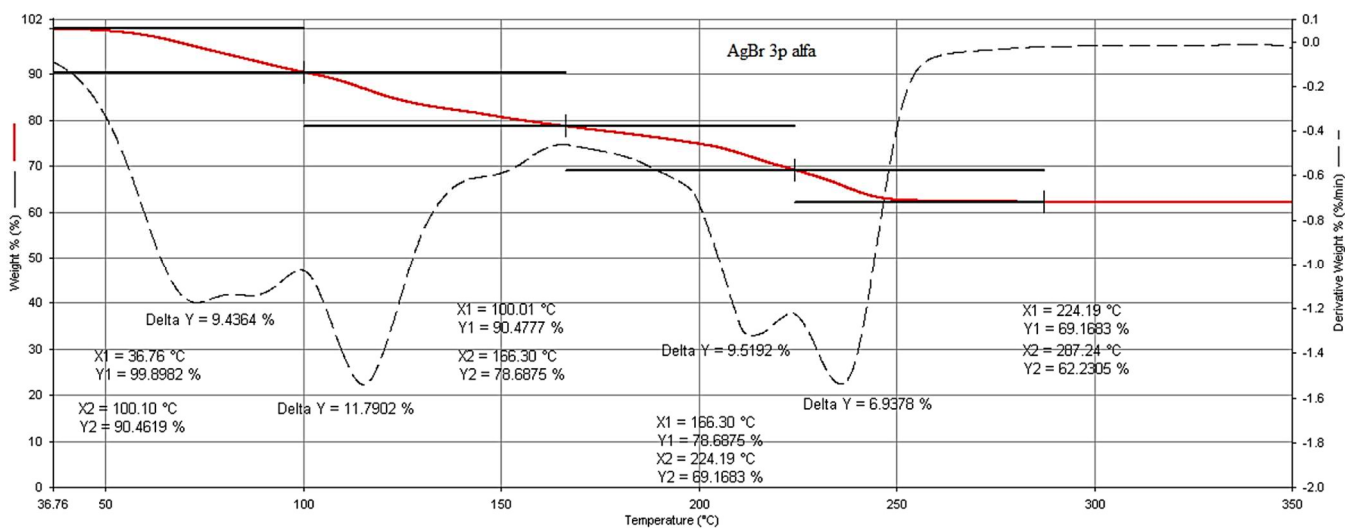

Figure 15 TGA analysis of  $[(\text{AgBr})(3\text{-pica})]_n$ .

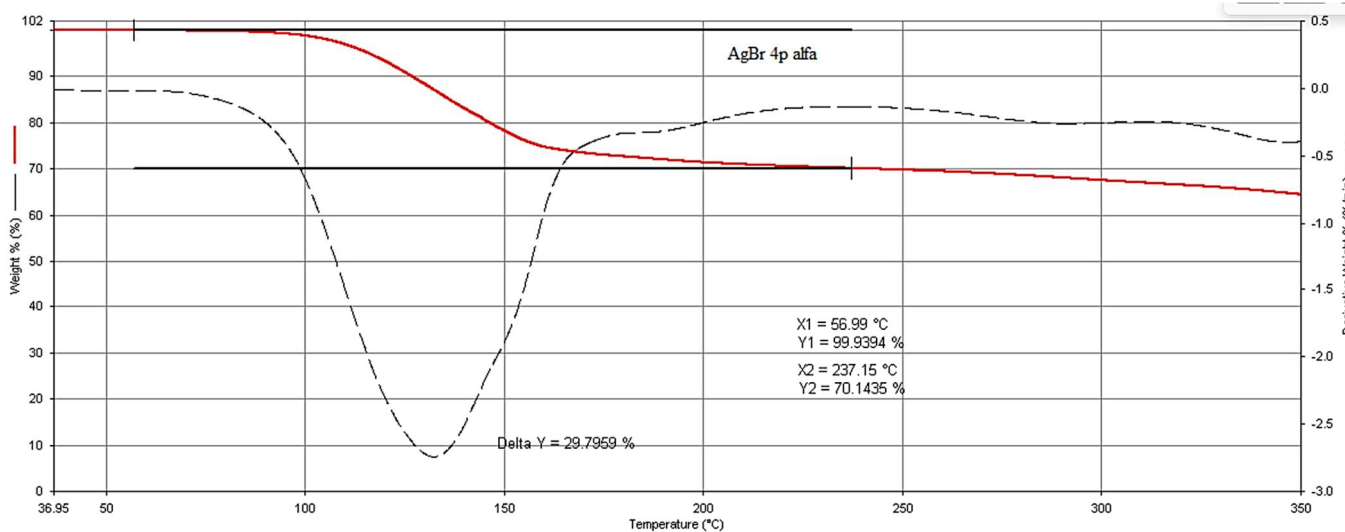

Figure 16 TGA analysis of  $[(\text{AgBr})(4\text{-pica})]_n$ .

### 5. $4\text{-pica}^+\text{Br}^-$

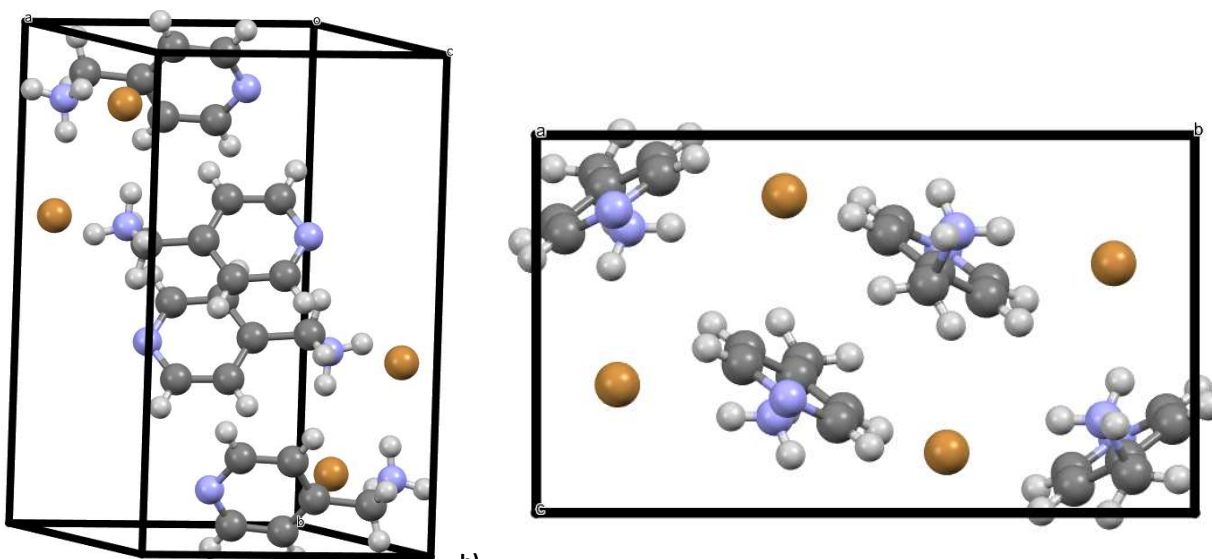

a)  $4\text{-pica}^+\text{Br}^-$  structure; b) packing along a-axis.

|                                            | <b>4-pica<sup>+</sup>Br<sup>-</sup></b>         |
|--------------------------------------------|-------------------------------------------------|
| Empirical formula                          | C <sub>6</sub> H <sub>9</sub> N <sub>2</sub> Br |
| Formula weight (g mol <sup>-1</sup> )      | 252.08                                          |
| T (K)                                      | 293                                             |
| Wavelength (Å)                             | 0.71073                                         |
| Crystal system                             | monoclinic                                      |
| Space group                                | P2 <sub>1</sub> /c                              |
| <i>a</i> (Å)                               | 7.8259(5)                                       |
| <i>b</i> (Å)                               | 13.3434(7)                                      |
| <i>c</i> (Å)                               | 7.8729(8)                                       |
| <i>α</i> (°)                               | 90                                              |
| <i>β</i> (°)                               | 103.640(9)                                      |
| <i>γ</i> (°)                               | 90                                              |
| <i>V</i> (Å <sup>3</sup> )                 | 798.934                                         |
| <i>Z</i> , <i>Z'</i>                       | 4, 1                                            |
| $\rho_{\text{calc}}$ (mg m <sup>-3</sup> ) | 1.572                                           |
| $\mu$ (mm <sup>-1</sup> )                  | 5.064                                           |
| F(000)                                     | 376                                             |
| crystal size (mm)                          | 0.475×0.364×0.021                               |
| $\vartheta$ range for data collection (°)  | 3.638° to 28.967°                               |
| reflections collected                      | 2231                                            |
| Independent reflections                    | 1427                                            |
| $R_{\text{int}}$                           | 0.0293                                          |
| Completeness to theta = 25.000°            | 99.8%                                           |
| Refinement method                          | Full-matrix least-squares on F <sup>2</sup>     |
| $T_{\text{max}}/T_{\text{min}}$            | 1.00000/0.65876                                 |
| data/restraints/parameters                 | 1427 / 0 / 83                                   |
| Goodness-of-fit                            | 1.069                                           |
| R1 [ <i>I</i> > 2σ( <i>I</i> )]            | 0.0428                                          |
| wR2 (all data)                             | 0.0913                                          |

CCDC 2170412 contains the supplementary crystallographic data for this paper. The data can be obtained free of charge from The Cambridge Crystallographic Data Centre via [www.ccdc.cam.ac.uk/structures](http://www.ccdc.cam.ac.uk/structures).
